# Supplementary material
Source: ML conference proceedings conference paper supplement (https://openreview.net/forum?id=3JUhkxVlyF)
Supplement: supplementary_material [file result.pdf › supplementary/ppo/result.pdf]

Harmless vs. Humor (3, 7)

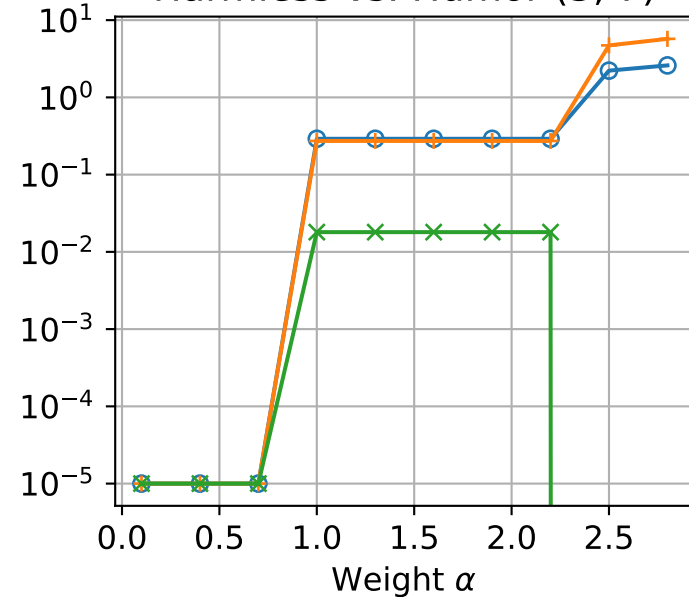

Harmless vs. Humor (5, 5)

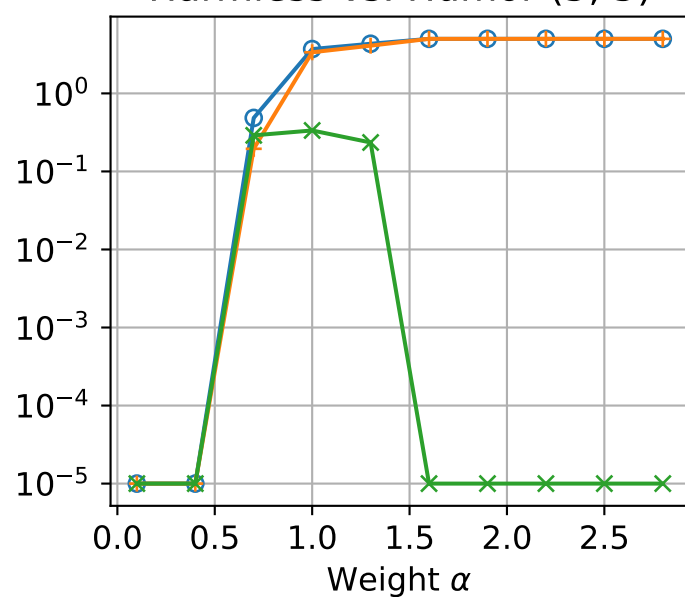

Harmless vs. Humor (7, 3)

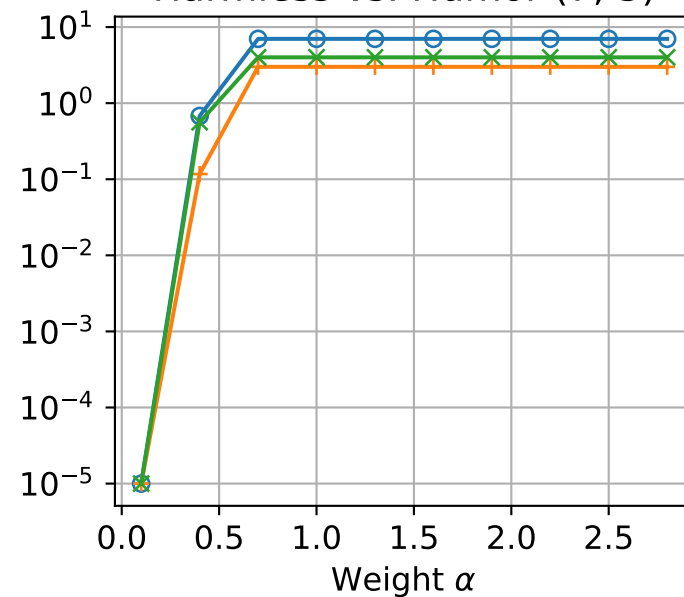

Faithful vs. Summary (7, 3)

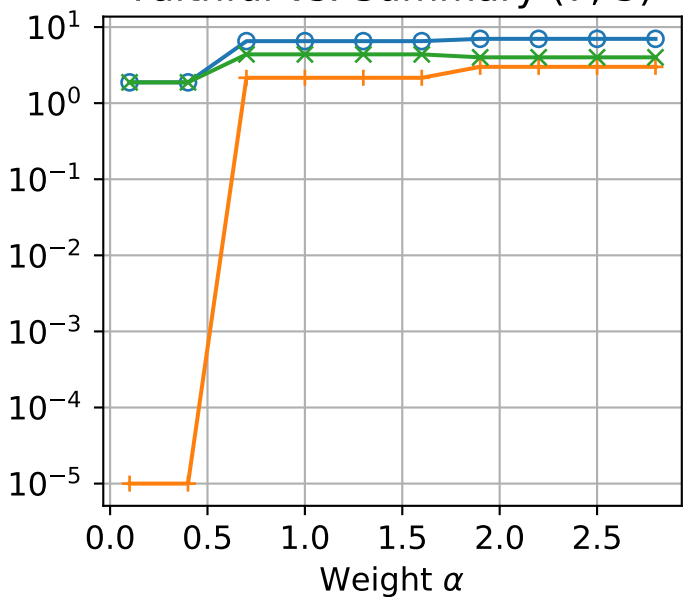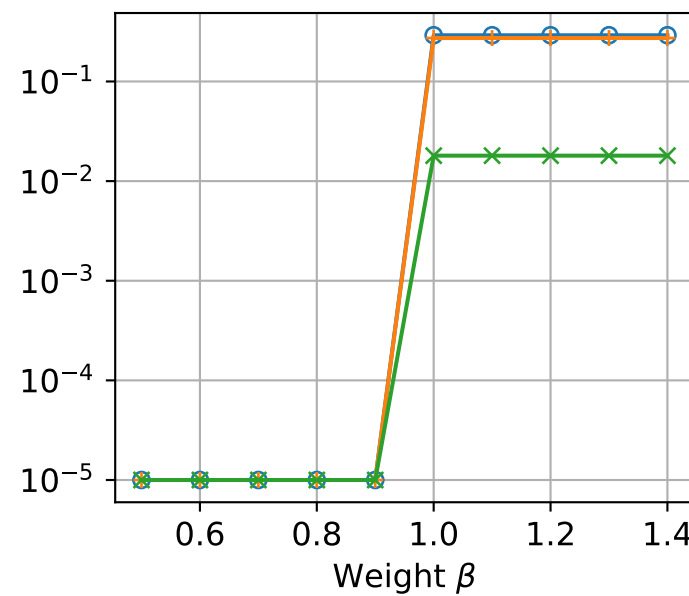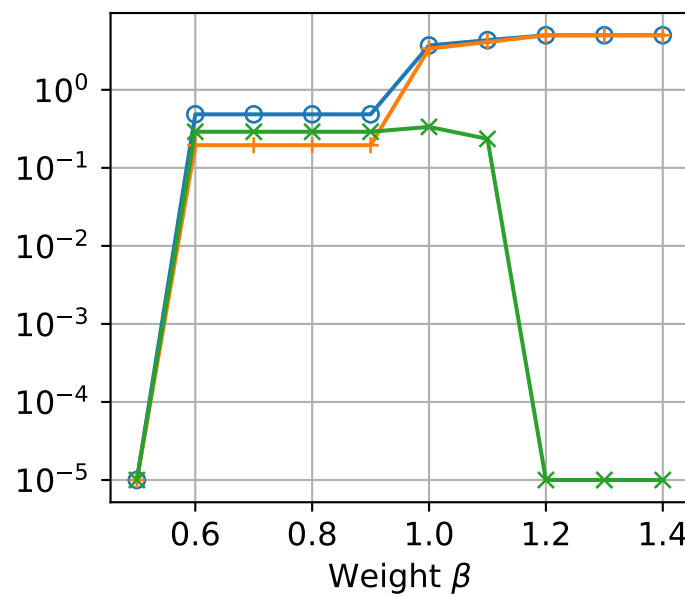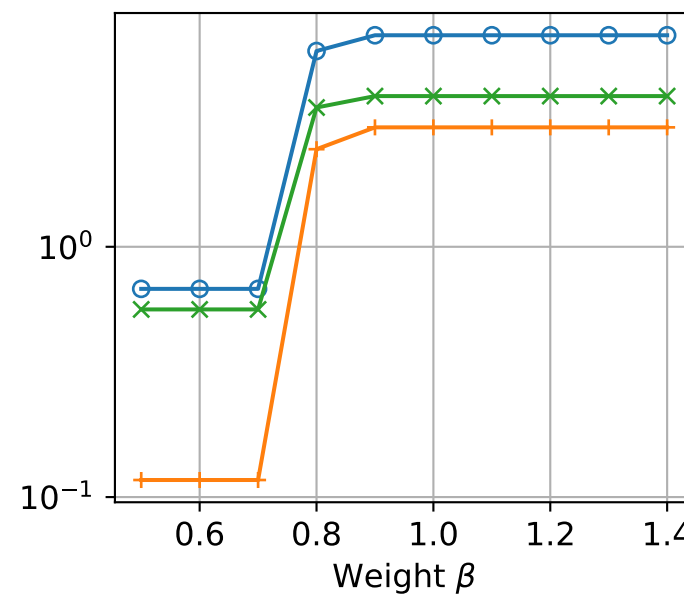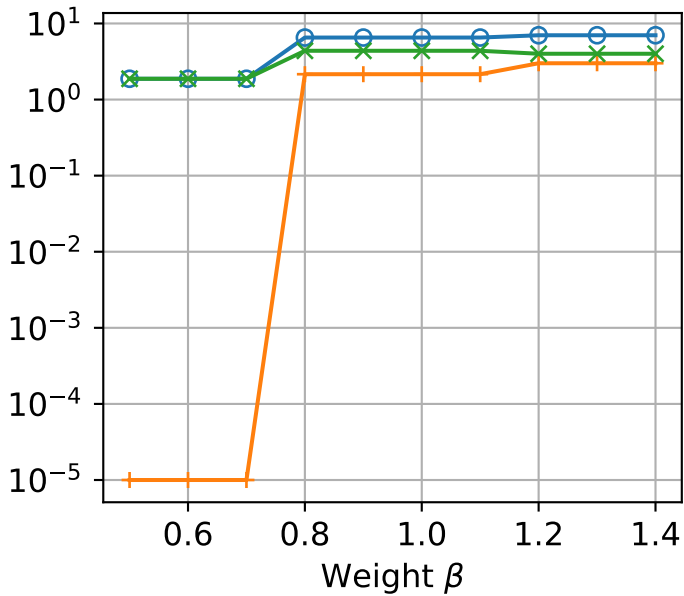

—○— Valuation    —+— Payment    —×— Utility
