# Supplementary material
Source: ML conference proceedings conference paper supplement (https://openreview.net/forum?id=3JUhkxVlyF)
Supplement: supplementary_material [file result_app.pdf › supplementary/ppo/result_app.pdf]

Helpful vs. Harmless (3, 7)

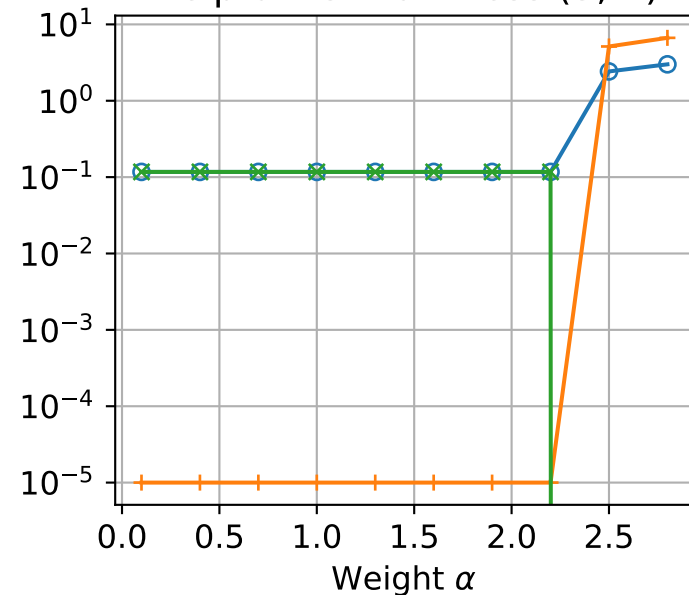

Helpful vs. Harmless (5, 5)

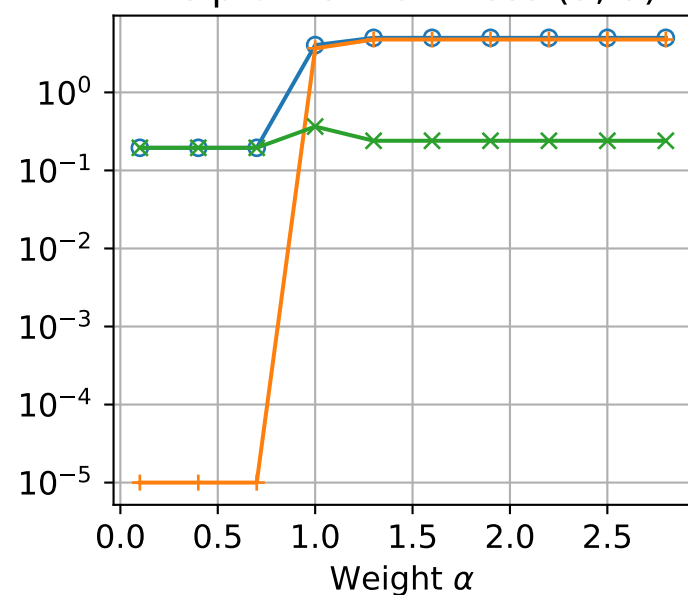

Helpful vs. Harmless (7, 3)

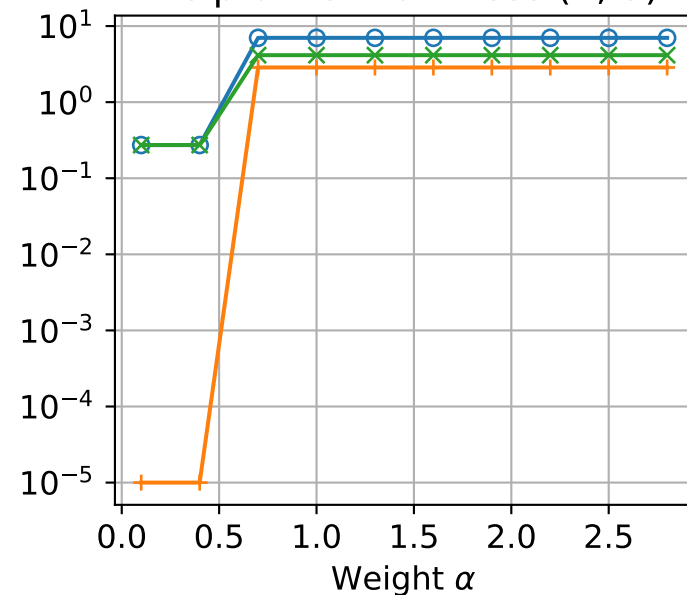

Faithful vs. Summary (3, 7)

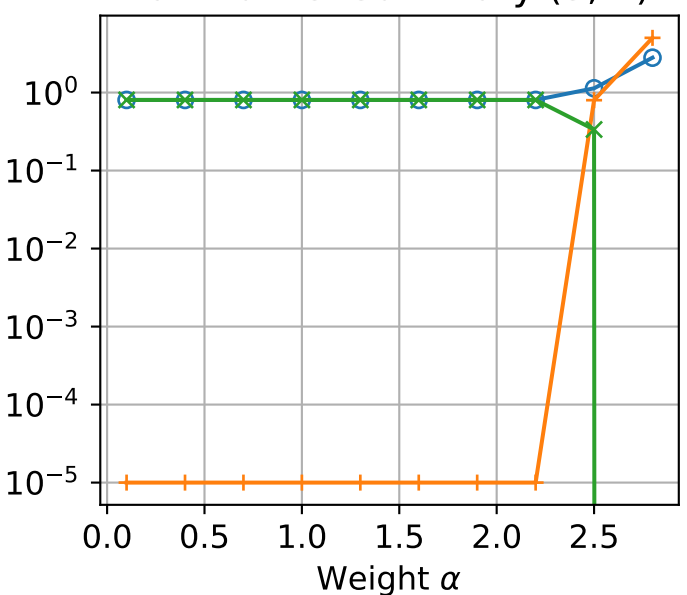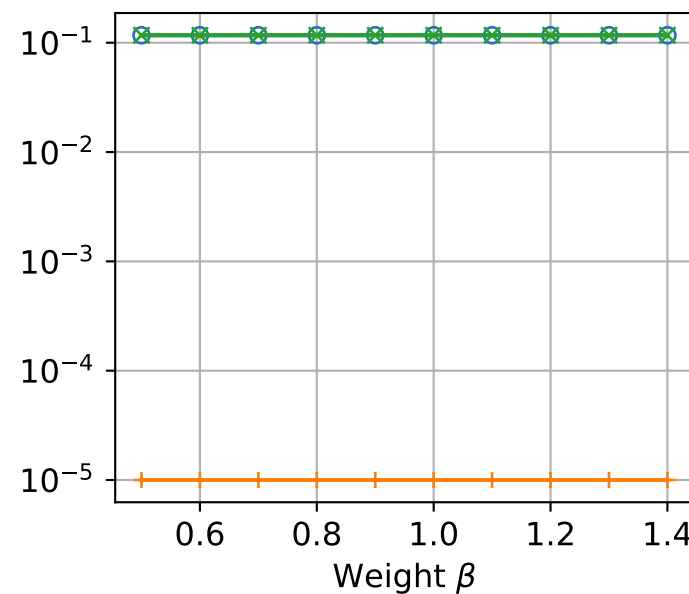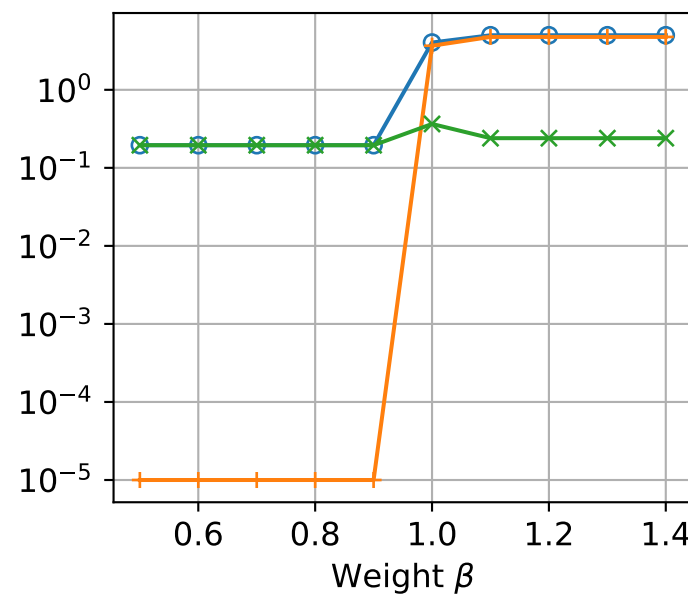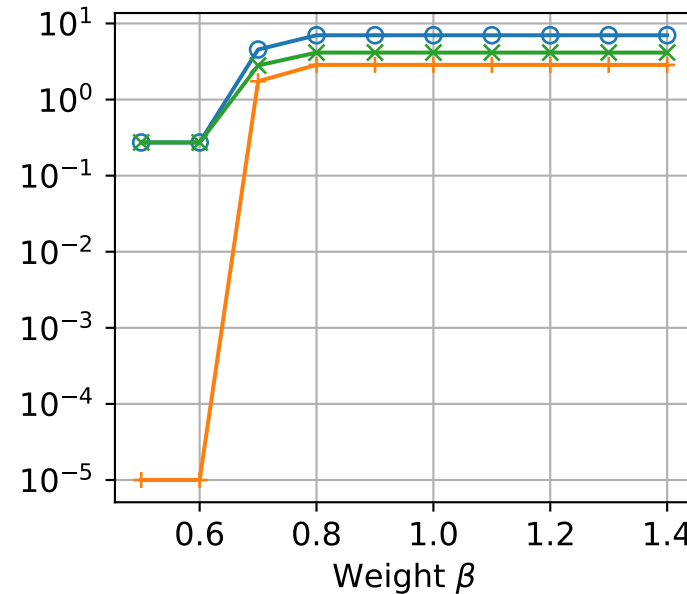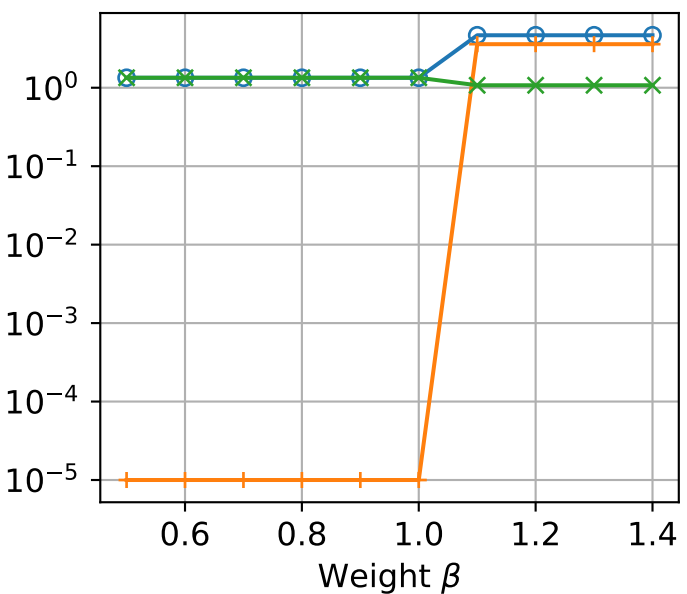

—○— Valuation    —+— Payment    —×— Utility
