# Supplementary material
Source: ML conference proceedings conference paper supplement (https://openreview.net/forum?id=3JUhkxVlyF)

Faithful vs. Summary (3, 7)

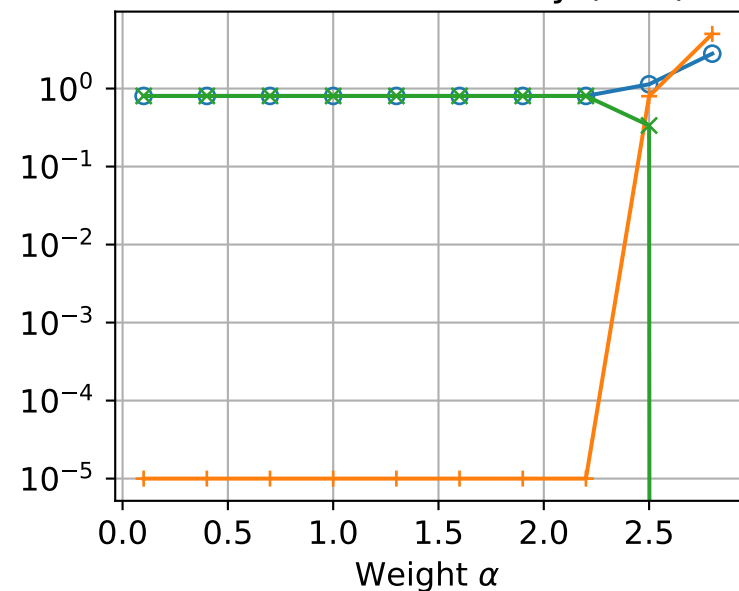

Faithful vs. Summary (5, 5)

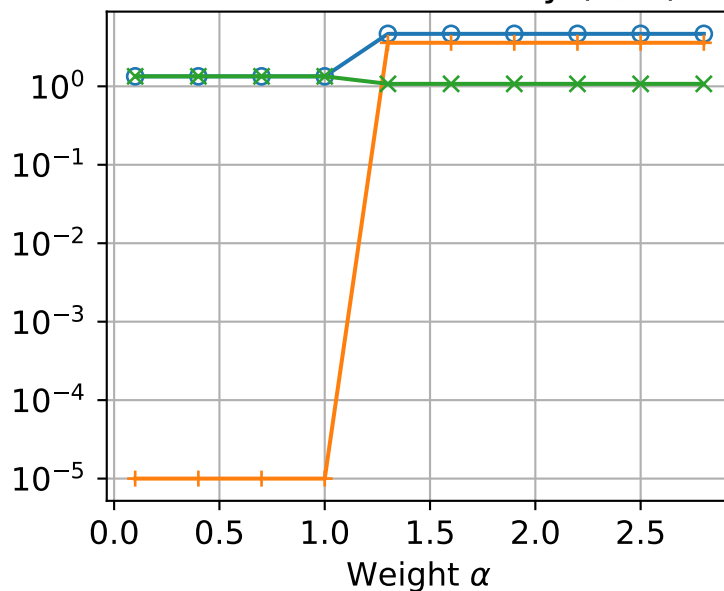

Faithful vs. Summary (7, 3)

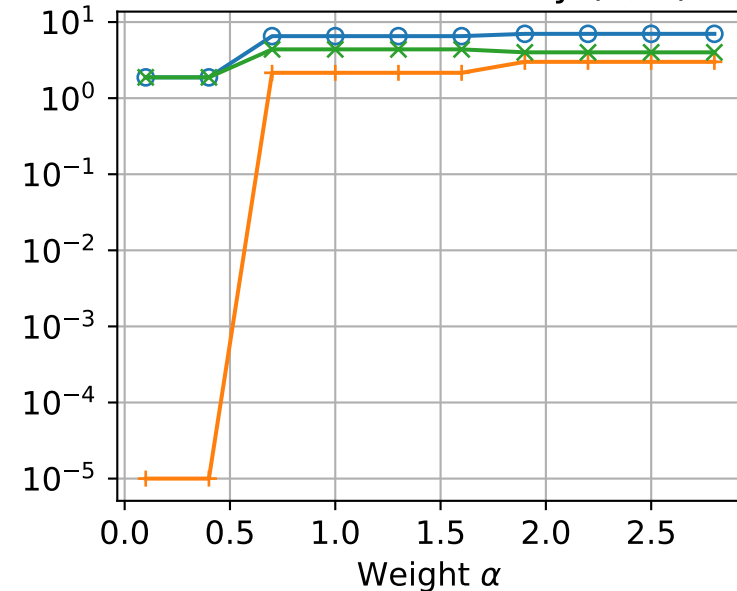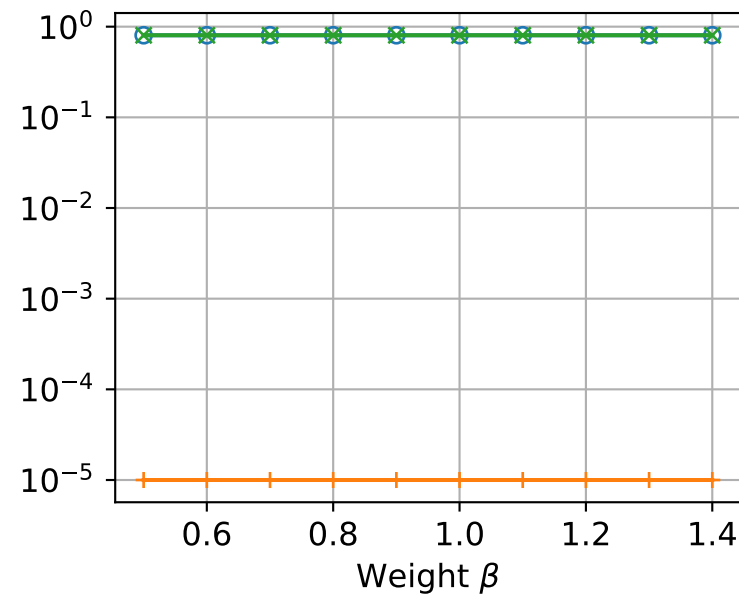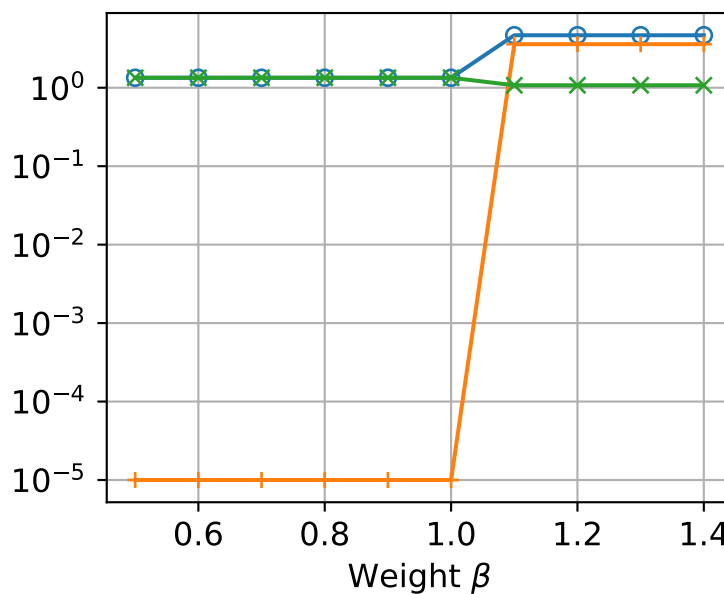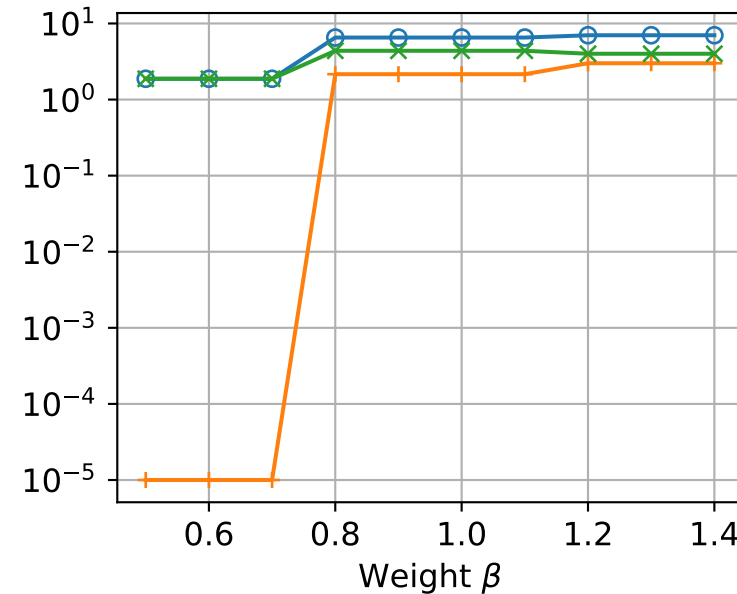

—○— Valuation    —+— Payment    —x— Utility

Supplement: supplementary_material [file result_faithful_summary.pdf › supplementary/ppo/result_faithful_summary.pdf]

Harmless vs. Humor (3, 7)

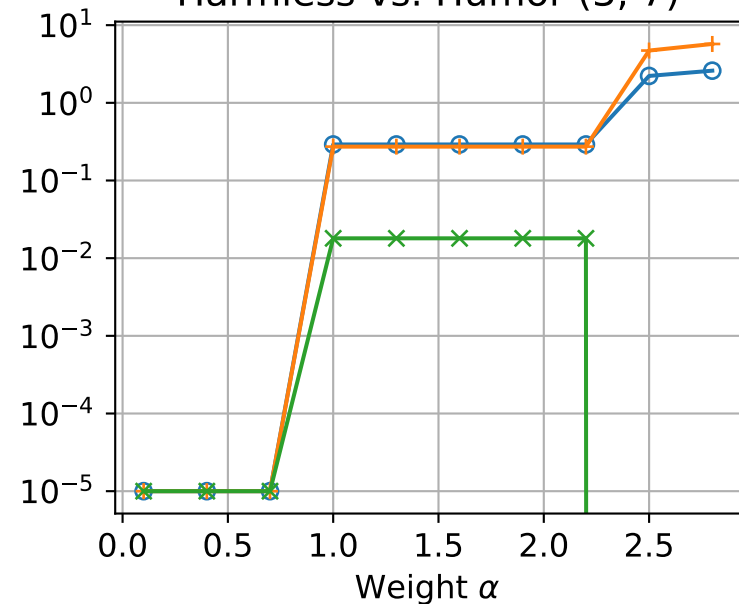

Harmless vs. Humor (5, 5)

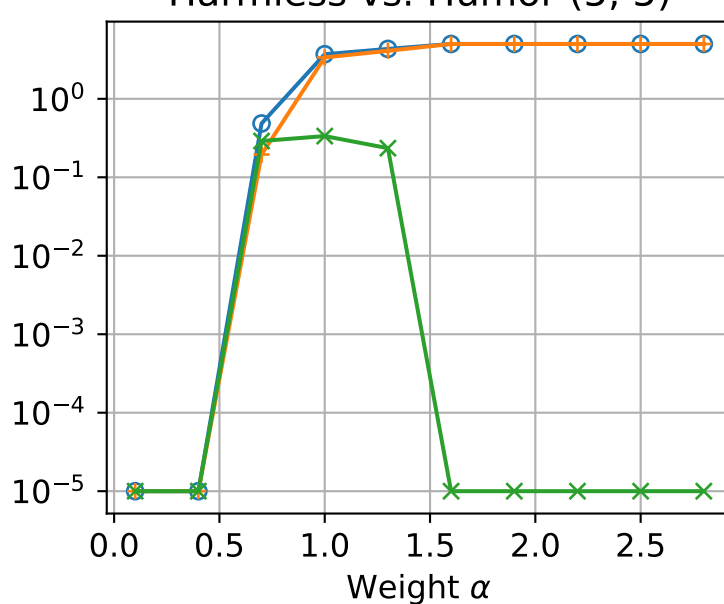

Harmless vs. Humor (7, 3)

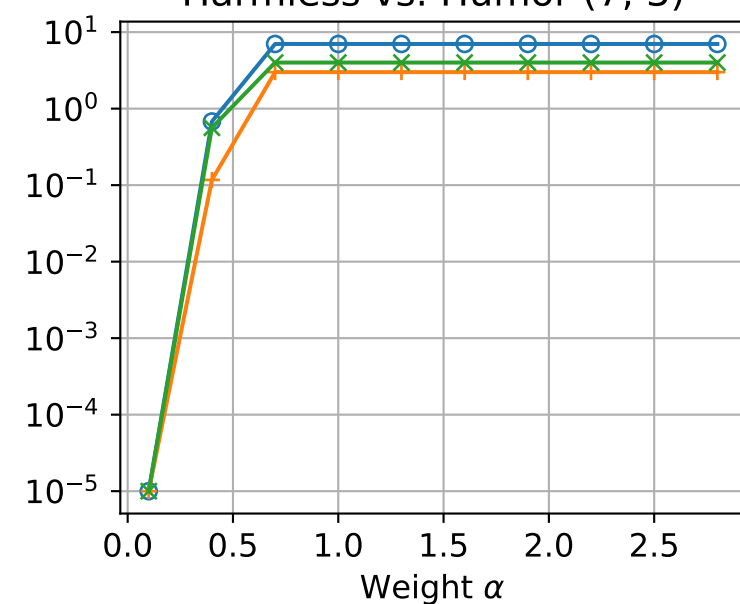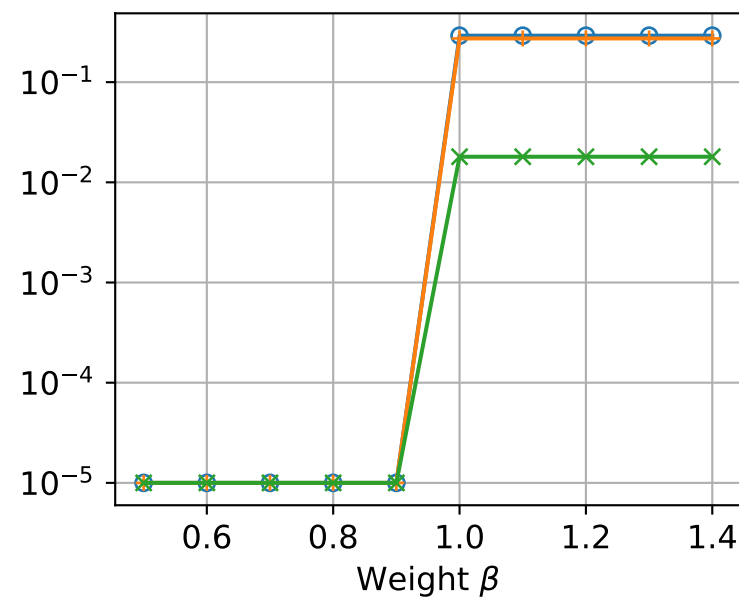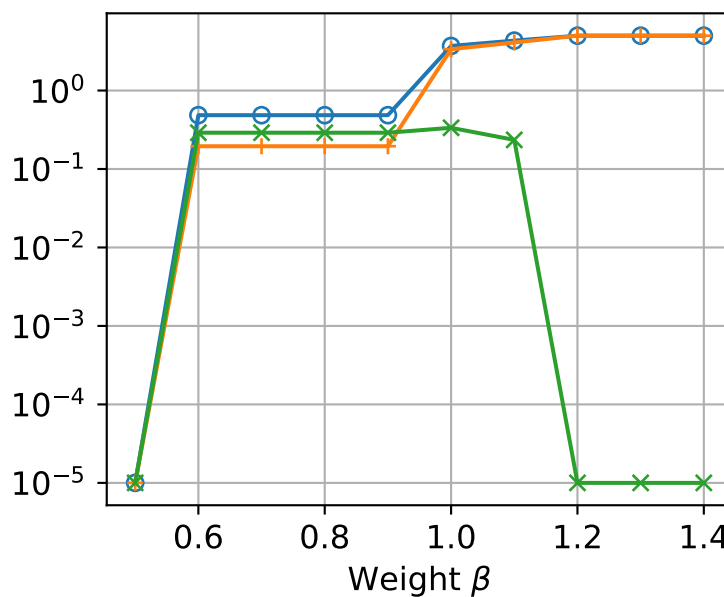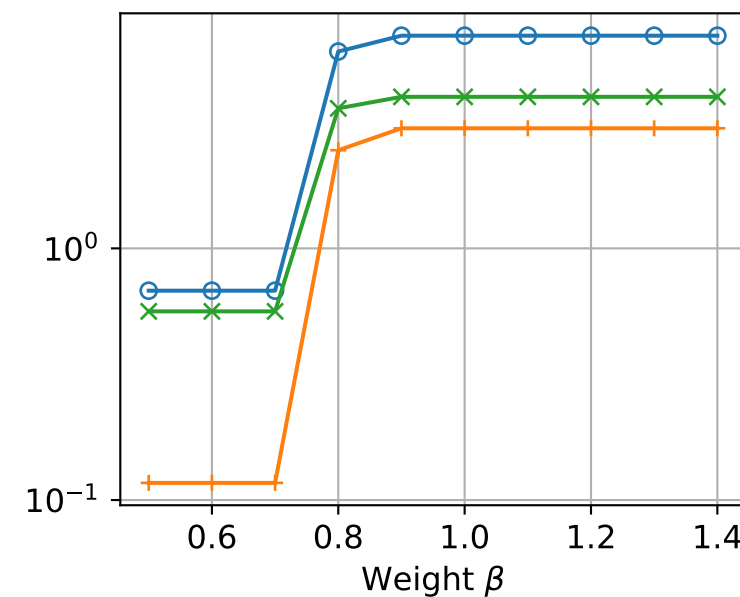

—○— Valuation    —+— Payment    —x— Utility

Supplement: supplementary_material [file result_harmless_humor.pdf › supplementary/ppo/result_harmless_humor.pdf]

Helpful vs. Harmless (3, 7)

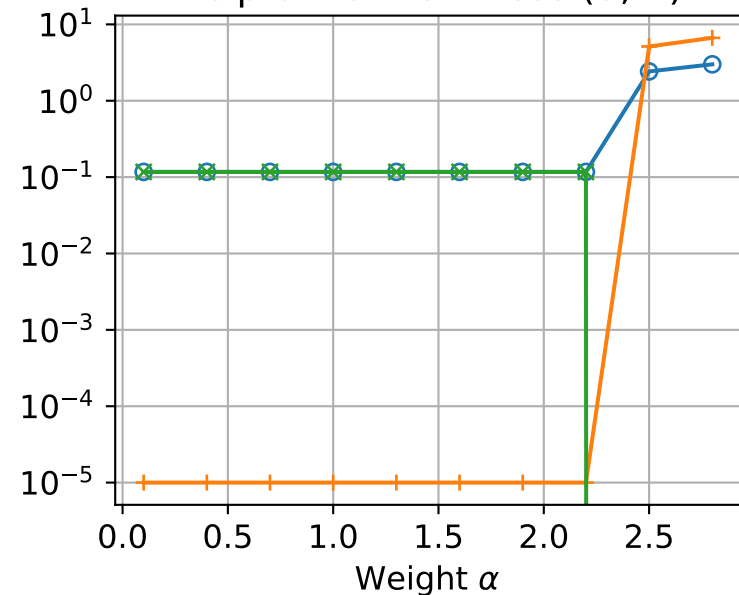

Helpful vs. Harmless (5, 5)

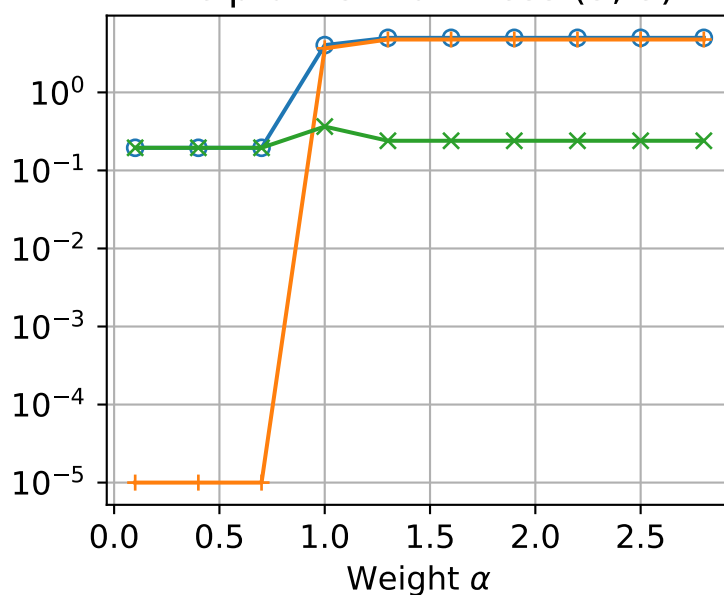

Helpful vs. Harmless (7, 3)

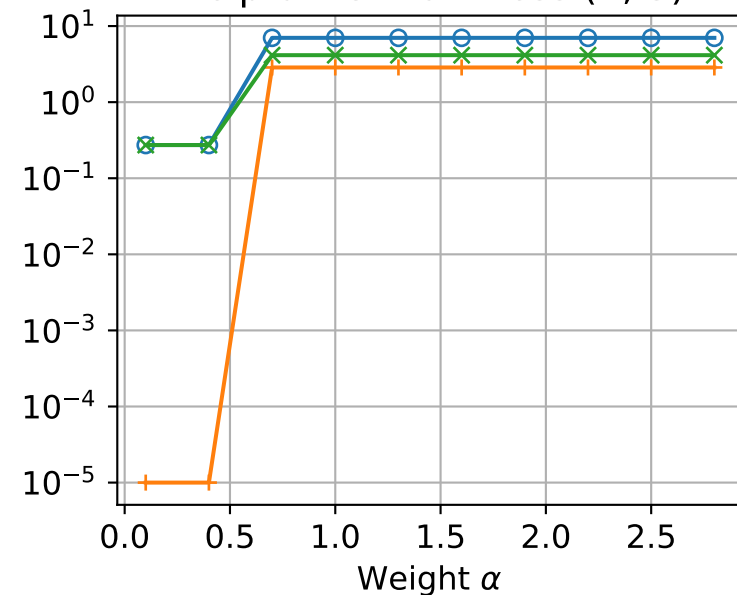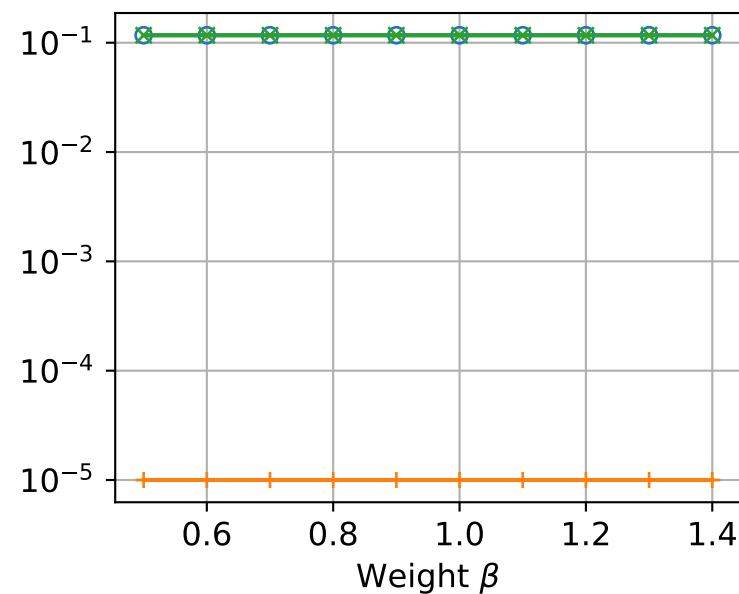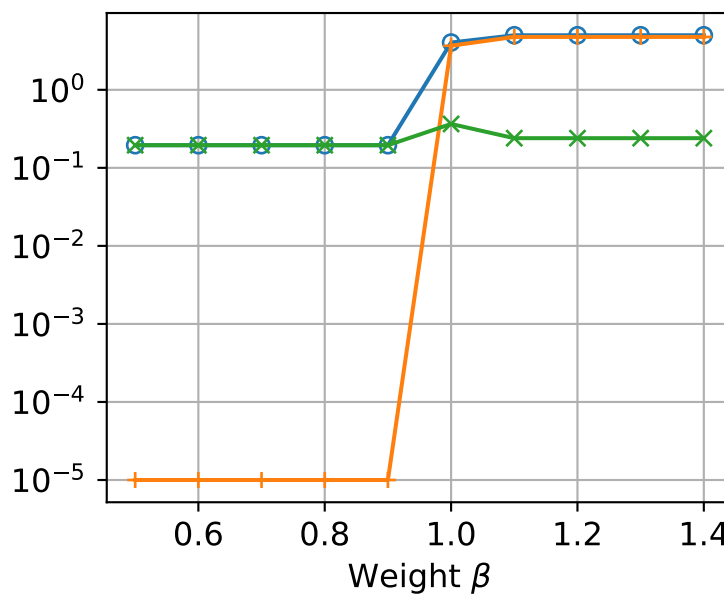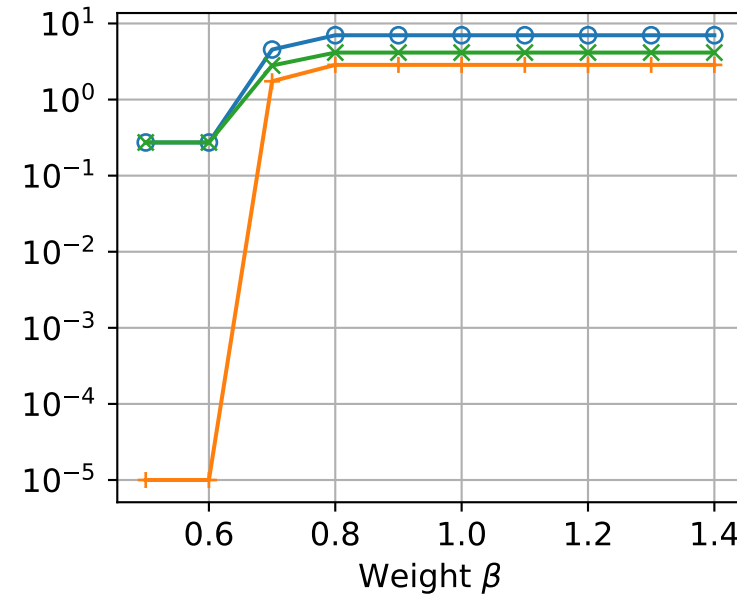

—○— Valuation    —+— Payment    —x— Utility

Supplement: supplementary_material [file result_helpful_harmless.pdf › supplementary/ppo/result_helpful_harmless.pdf]

Helpful vs. Harmless (3, 7)

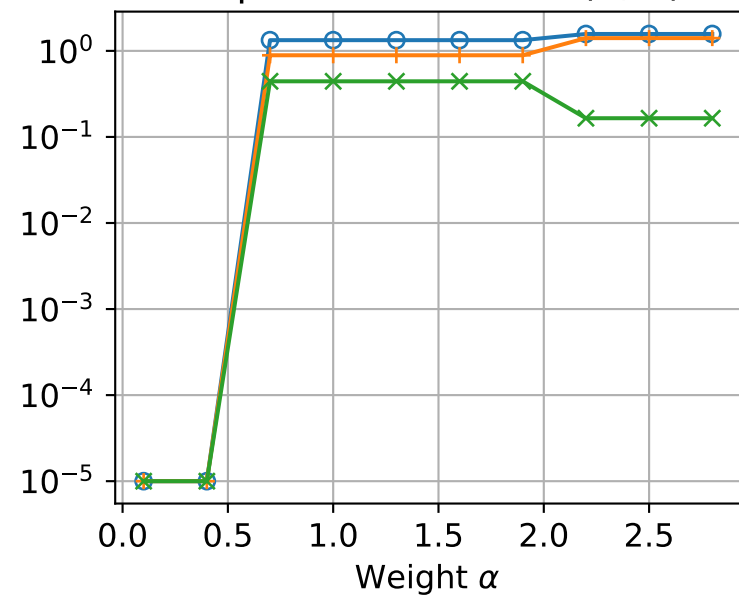

Helpful vs. Harmless (5, 5)

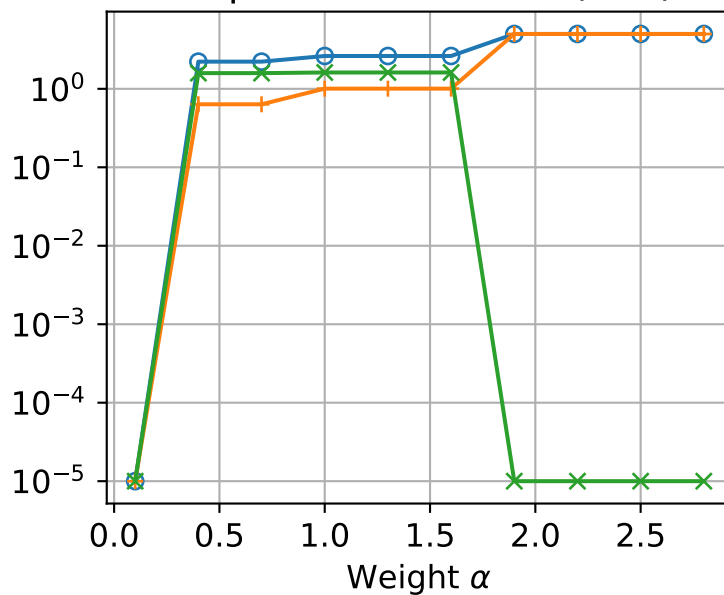

Helpful vs. Harmless (7, 3)

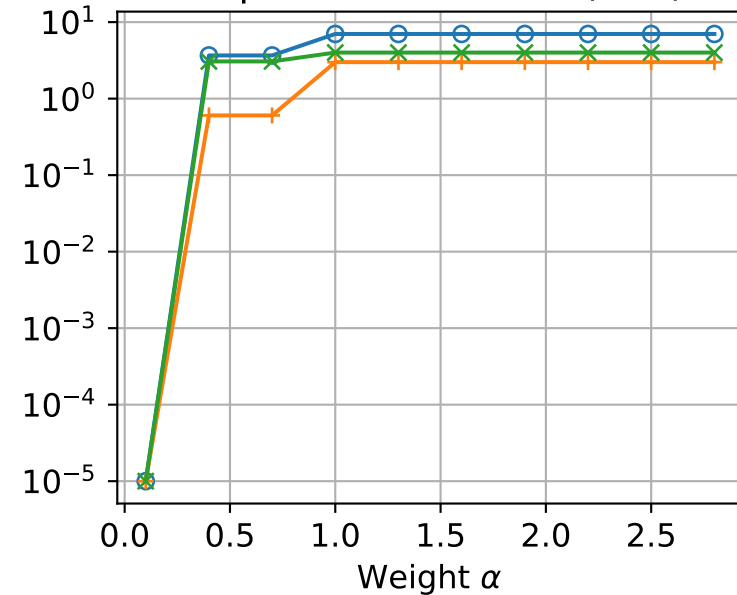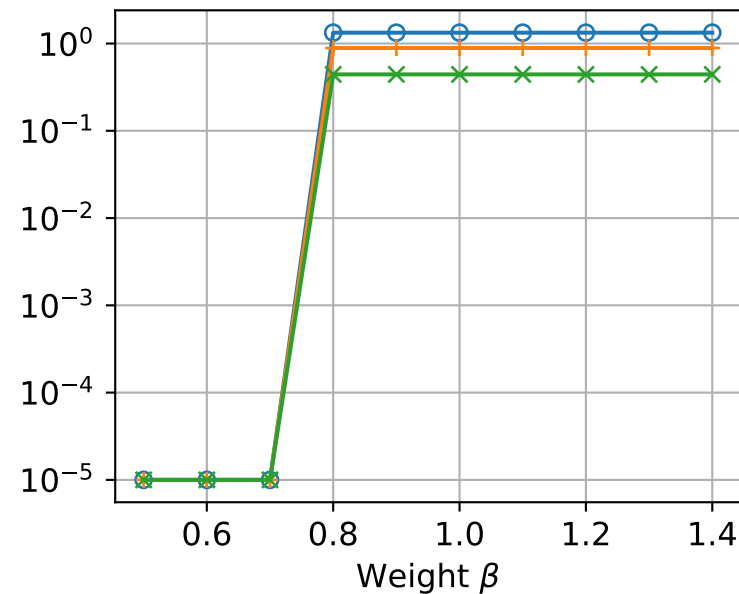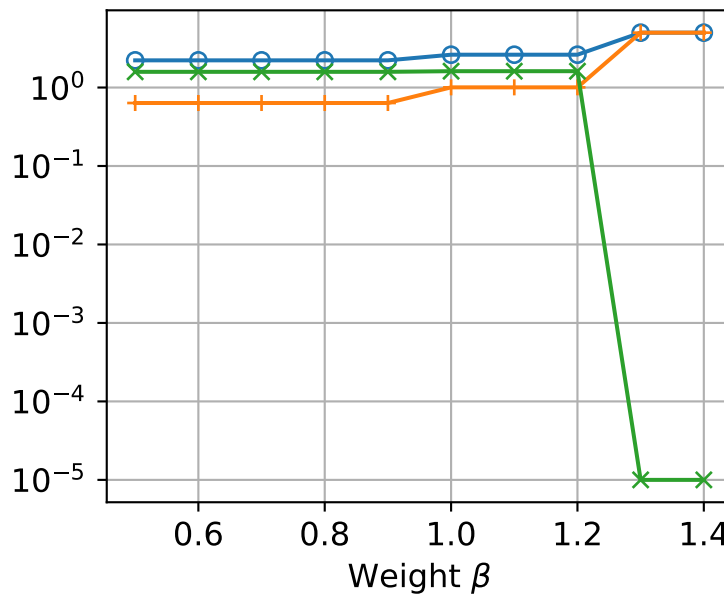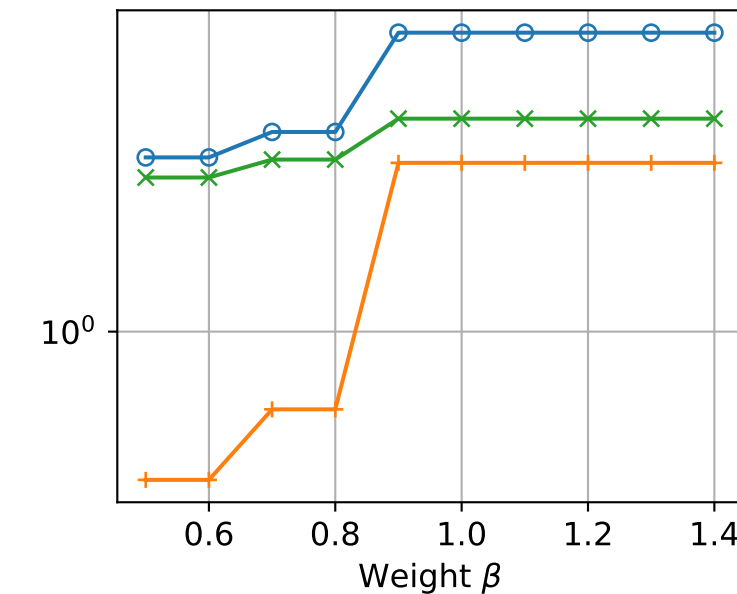

—○— Valuation      —+— Payment      —x— Utility

Supplement: supplementary_material [file result_helpful_harmless_alpaca.pdf › supplementary/ppo/result_helpful_harmless_alpaca.pdf]
